# Supplementary material
Source: PubMed Central journal article supplement (PMC3217087)
Supplement: NIHMS318315-supplement-5.pdf [file NIHMS318315-supplement-5.pdf]

the mean  $\pm$  SD of three independent wells for each experimental treatment and were identical across three separate experiments.

**Figure 11. Relationship between TLR2 and signaling pathways regulating IL-12 family member expression in microglia.** Intact Gram-positive bacteria trigger TLR9 activation via CpG DNA, which stimulates IL-12 family member production. In the absence of TLR2, TLR9 activation remains unchecked, resulting in exaggerated cytokine release. Both PI3K and MAPK pathways influence IL-12 expression in response to intact bacteria.

**Supplemental Figure 1. TLR2 loss leads to elevated IL-12 family cytokine production in macrophages upon exposure to intact *S. aureus*.** Thioglycollate-elicited peritoneal macrophages from TLR2 WT and KO mice were seeded at  $2 \times 10^5$  cells per well in 96-well plates and incubated overnight. After 24 h, cells were exposed to  $10^7$  cfu heat-inactivated *S. aureus* for 24 h, whereupon IL-12p40 (A), IL-12p70 (B), IL-27 (C) and CCL2 (D) production was quantitated by ELISA. Significant differences between TLR2 KO versus WT macrophages are indicated by asterisks (\*,  $p < 0.001$ ). Results are reported as the mean  $\pm$  SD of three independent wells for each experimental treatment and were identical across three separate experiments.

**Supplemental Figure 2. Exaggerated IL-12p40 production by TLR2 KO macrophages is conserved upon exposure to various streptococcal and staphylococcal species.**

Thioglycollate-elicited peritoneal macrophages from TLR2 WT and KO mice were seeded at  $2 \times 10^5$  cells per well in 96-well plates and incubated overnight. After 24 h, cells were exposed to  $2 \times 10^5$  cfu/well of live Gram-positive bacteria for 6 h, whereupon IL-12p40 production was quantitated by ELISA. Significant differences between TLR2 KO versus WT macrophages are

indicated by asterisks (\*,  $p < 0.05$ ). Results are reported as the mean  $\pm$  SD of two independent wells for each experimental treatment and were identical across two separate experiments.

**Supplemental Figure 3. Gram-negative bacteria do not augment IL-12p40 production in TLR2 KO macrophages.** Thioglycollate-elicited peritoneal macrophages from TLR2 WT and KO mice were seeded at  $2 \times 10^5$  cells per well in 96-well plates and incubated overnight. After 24 h, cells were exposed to  $2 \times 10^5$  cfu/well of live Gram-negative bacteria for 6 h, whereupon IL-12p40 production was quantitated by ELISA. Results are reported as the mean  $\pm$  SD of three independent wells for each experimental treatment and were identical across two separate experiments.

**Supplemental Figure 4. TLR9 blockade prevents exaggerated IL-12p40 expression in TLR2 KO macrophages.** Thioglycollate-elicited peritoneal macrophages from TLR2 WT and KO mice were seeded at  $2 \times 10^5$  cells per well in 96-well plates and incubated overnight. After 24 h, cells were exposed to heat-inactivated *S. aureus* ( $10^7$  cfu/well)  $\pm$  the inhibitory CpG ODN 2088 for 24 h, whereupon IL-12p40 production was quantitated by ELISA. Significant differences between TLR2 KO versus WT microglia are indicated by asterisks (\*,  $p < 0.05$ ), whereas differences between TLR2 KO microglia treated with *S. aureus* only versus *S. aureus* + ODN 2088 are indicated by hatched signs (#,  $p < 0.05$ ). Results are reported as the mean  $\pm$  SD of three independent wells for each experimental treatment and were identical across two separate experiments.
